# Supplementary material
Source: MDPI journal article supplement (https://www.mdpi.com/2073-4352/8/1/51)
Supplement: s1 [file s1]

Determination of the correct composition of “hydrous lead(II) oxotellurate(IV)” as  $\text{PbTeO}_3$ , crystallizing as a new polymorph

### Supplementary material

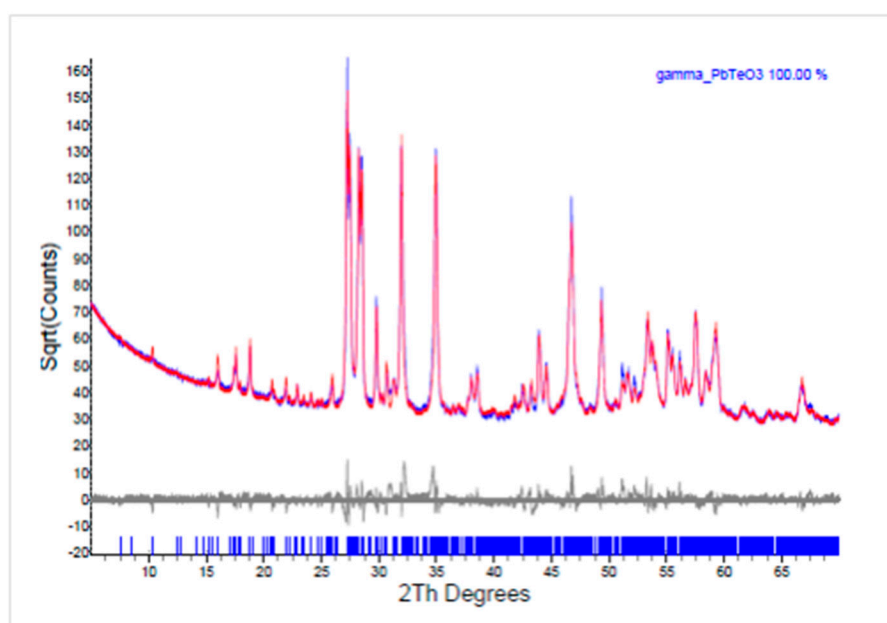

**Supplementary Figure 1.** Rietveld refinement of  $\gamma\text{-PbTeO}_3$ .

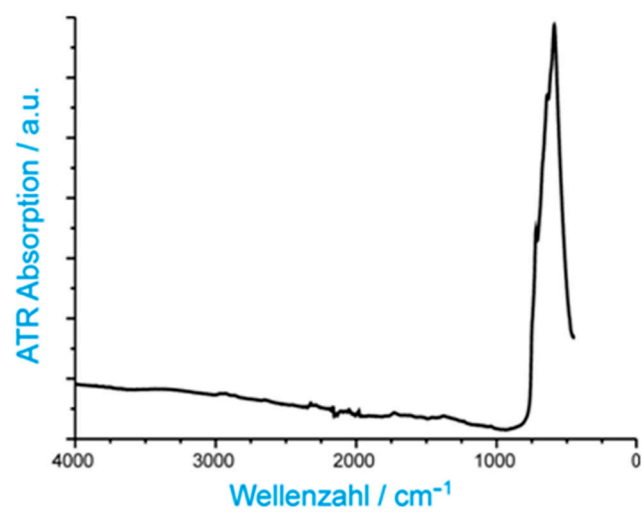

**Supplementary Figure 2.** IR spectrum of  $\gamma$ -PbTeO<sub>3</sub>.
